# Supplementary material for: The 40bp Indel Polymorphism rs150550023 in the MDM2 Promoter is Associated with Intriguing Shifts in Gene Expression in the p53-MDM2 Regulatory Hub
Source: Cancers (Basel). 2020 Nov 13;12(11):3363. doi: 10.3390/cancers12113363 (PMC7697608; doi:10.3390/cancers12113363)
Supplement: Supplementary file 1 [file cancers-12-03363-s001.pdf]

# The 40bp Indel Polymorphism rs150550023 in the *MDM2* Promoter is Associated with Intriguing Shifts in Gene Expression in the p53-MDM2 Regulatory Hub

Heidi Miedl, Bianca Dietrich, Klaus Kaserer and Martin Schreiber

**Table 1.** Clinical characteristics and genotype frequencies of rs150550023 of the study population.

|                        |           | rs150550023 genotype |         |         |         |         |         |                 |  |
|------------------------|-----------|----------------------|---------|---------|---------|---------|---------|-----------------|--|
| Total                  |           | Ins/Ins              |         | Ins/Del |         | Del/Del |         | <i>p</i> -value |  |
| All subjects           | 661       | 225                  | (34.0%) | 329     | (49.8%) | 107     | (16.2%) |                 |  |
| Patients               | 407       | 144                  | (35.4%) | 201     | (49.4%) | 62      | (15.2%) |                 |  |
| Controls               | 254       | 81                   | (31.9%) | 128     | (50.4%) | 45      | (17.7%) |                 |  |
| Control subpopulations |           |                      |         |         |         |         |         |                 |  |
|                        | TT        | 105                  | 12      | (11.4%) | 49      | (46.7%) | 44      | (41.9%)         |  |
| SNP309 genotype        | TG        | 121                  | 43      | (35.5%) | 77      | (63.6%) | 1       | (0.8%)          |  |
|                        | GG        | 28                   | 26      | (92.9%) | 2       | (7.1%)  | 0       | (0.0%)          |  |
| Patient subpopulations |           |                      |         |         |         |         |         |                 |  |
|                        | TT        | 168                  | 28      | (16.7%) | 82      | (48.8%) | 58      | (34.5%)         |  |
| SNP309 genotype        | TG        | 178                  | 61      | (34.3%) | 114     | (64.0%) | 3       | (1.7%)          |  |
|                        | GG        | 59                   | 55      | (93.2%) | 3       | (5.1%)  | 1       | (1.7%)          |  |
| Age (years)            | <55       | 171                  | 65      | (38.0%) | 80      | (46.8%) | 26      | (15.2%)         |  |
|                        | ≥55       | 236                  | 79      | (33.5%) | 121     | (51.3%) | 36      | (15.3%)         |  |
| Menopausal status      | pre       | 99                   | 36      | (36.4%) | 47      | (47.5%) | 16      | (16.2%)         |  |
|                        | post      | 252                  | 88      | (34.9%) | 127     | (50.4%) | 37      | (14.7%)         |  |
|                        | na        | 56                   | 20      | (35.7%) | 27      | (48.2%) | 9       | (16.1%)         |  |
| Tumor type             | ductal    | 249                  | 88      | (35.3%) | 127     | (51.0%) | 34      | (13.7%)         |  |
|                        | lobular   | 81                   | 27      | (33.3%) | 39      | (48.1%) | 15      | (18.5%)         |  |
|                        | other, na | 77                   | 29      | (37.7%) | 35      | (45.5%) | 13      | (16.9%)         |  |
| Tumor size             | pT1       | 175                  | 65      | (37.1%) | 80      | (45.7%) | 30      | (17.1%)         |  |
|                        | pT2–4     | 160                  | 54      | (33.8%) | 87      | (54.4%) | 19      | (11.9%)         |  |
|                        | other, na | 73                   | 26      | (35.6%) | 34      | (46.6%) | 13      | (17.8%)         |  |
| Stage                  | 0–1       | 142                  | 55      | (38.7%) | 60      | (42.3%) | 27      | (19.0%)         |  |
|                        | 2–4       | 188                  | 58      | (30.9%) | 106     | (56.4%) | 24      | (12.8%)         |  |
|                        | other, na | 77                   | 31      | (40.3%) | 35      | (45.5%) | 11      | (14.3%)         |  |
| Grade                  | pG1–2     | 239                  | 81      | (33.9%) | 116     | (48.5%) | 42      | (17.6%)         |  |
|                        | pG3       | 145                  | 56      | (38.6%) | 74      | (51.0%) | 15      | (10.3%)         |  |
|                        | na        | 23                   | 7       | (30.4%) | 11      | (47.8%) | 5       | (21.7%)         |  |
| Lymph node status      | pN0       | 195                  | 75      | (38.5%) | 85      | (43.6%) | 35      | (17.9%)         |  |
|                        | pN+       | 133                  | 36      | (27.1%) | 81      | (60.9%) | 16      | (12.0%)         |  |
|                        | na        | 68                   | 33      | (48.5%) | 35      | (51.5%) | 0       | (0.0%)          |  |
| ER status              | pos       | 267                  | 86      | (32.2%) | 135     | (50.6%) | 46      | (17.2%)         |  |
|                        | neg       | 123                  | 49      | (39.8%) | 59      | (48.0%) | 15      | (12.2%)         |  |
|                        | na        | 17                   | 9       | (52.9%) | 7       | (41.2%) | 1       | (5.9%)          |  |
| PR status              | pos       | 187                  | 60      | (32.1%) | 89      | (47.6%) | 38      | (20.3%)         |  |
|                        | neg       | 197                  | 74      | (37.6%) | 101     | (51.3%) | 22      | (11.2%)         |  |
|                        | na        | 23                   | 10      | (43.5%) | 11      | (47.8%) | 2       | (8.7%)          |  |
| HER2 status            | pos       | 74                   | 26      | (35.1%) | 39      | (52.7%) | 9       | (12.2%)         |  |
|                        | neg       | 296                  | 101     | (34.1%) | 147     | (49.7%) | 48      | (16.2%)         |  |

|                |      |     |     |         |     |         |    |         |       |
|----------------|------|-----|-----|---------|-----|---------|----|---------|-------|
| p53 status     | na   | 37  | 17  | (45.9%) | 15  | (40.5%) | 5  | (13.5%) | 0.126 |
|                | pos  | 97  | 29  | (29.9%) | 57  | (58.8%) | 11 | (11.3%) |       |
|                | neg  | 284 | 102 | (35.9%) | 134 | (47.2%) | 48 | (16.9%) |       |
|                | na   | 26  | 13  | (50.0%) | 10  | (38.5%) | 3  | (11.5%) |       |
| KI67 pos cells | ≤10% | 183 | 59  | (32.2%) | 90  | (49.2%) | 34 | (18.6%) | 0.160 |
|                | >10% | 124 | 51  | (41.1%) | 58  | (46.8%) | 15 | (12.1%) |       |
|                | na   | 99  | 34  | (34.3%) | 52  | (52.5%) | 13 | (13.1%) |       |

Numbers of all patients and controls, as well as number of patients in the indicated subgroups are shown. Parenthesized numbers show the fraction of patients (%) with the indicated genotypes. P-values were calculated with Chi-square tests, not including na subjects. ER, estrogen receptor; PR, progesterone receptor; na, status not available.

**Publisher's Note:** MDPI stays neutral with regard to jurisdictional claims in published maps and institutional affiliations.

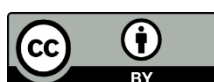

© 2020 by the authors. Licensee MDPI, Basel, Switzerland. This article is an open access article distributed under the terms and conditions of the Creative Commons Attribution (CC BY) license (<http://creativecommons.org/licenses/by/4.0/>).
